# Supplementary material for: Impacts of the Denver Cyclone on Regional Air Quality and Aerosol Formation in the Colorado Front Range during FRAPPÉ 2014
Source: Copernicus journal article supplement (doi:10.5194/acp-2016-532), 2016-06-30
Supplement: Supplementary file 1 [file acp-2016-532-supplement.pdf]

# Impacts of the Denver Cyclone on Regional Air Quality and Aerosol Formation in the Colorado Front Range during FRAPPÉ 2014

5 Kennedy T. Vu<sup>1</sup>, Justin H. Dingle<sup>1</sup>, Roya Bahreini<sup>1,2</sup>, Patrick J. Reddy<sup>3†</sup>, Teresa L. Campos<sup>3</sup>, Joshua P. DiGangi<sup>4</sup>, Glenn S. Diskin<sup>4</sup>, Alan Fried<sup>5</sup>, Scott C. Herndon<sup>6</sup>, Rebecca S. Hornbrook<sup>3</sup>, Greg Huey<sup>7</sup>, Lisa Kaser<sup>3</sup>, Denise D. Montzka<sup>3</sup>, John B. Nowak<sup>6</sup>, Sally E. Pusede<sup>8</sup>, Dirk Richter<sup>5</sup>, Joseph R. Roscioli<sup>6</sup>, Glen W. Sachse<sup>9</sup>, Stephen Shertz<sup>3</sup>, Meghan Stell<sup>3</sup>, David Tanner<sup>7</sup>, Geoff Tyndall<sup>3</sup>, James Walega<sup>5</sup>, Peter Weibring<sup>5</sup>, Andrew J. Weinheimer<sup>3</sup>, Gabriele Pfister<sup>3</sup>, Frank Flocke<sup>3</sup>

10 <sup>1</sup> Environmental Toxicology Graduate Program, University of California, Riverside, CA 92521

<sup>2</sup> Department of Environmental Sciences, University of California, Riverside, CA 92521

<sup>3</sup> Atmospheric Chemistry Observations & Modeling Laboratory, National Center for Atmospheric Research, Boulder, CO 80301

<sup>4</sup> Chemistry and Dynamics Branch, NASA Langley Research Center, Hampton, VA 23681

15 <sup>5</sup> Institute for Arctic and Alpine Research, University of Colorado, Boulder, CO 80303

<sup>6</sup> Aerodyne Research, Inc., Billerica, MA 01821

<sup>7</sup> Department of Earth and Atmospheric Sciences, Georgia Institute of Technology, Atlanta, GA 30033

<sup>8</sup> Department of Environmental Sciences, University of Virginia, Charlottesville, VA 22904

<sup>9</sup> National Institute of Aerospace, Hampton, VA 23666

20 <sup>†</sup> Visitor at NCAR, Boulder, CO 80301

*Correspondence to:* R. Bahreini (Roya.Bahreini@ucr.edu)

Supplementary Figures and Tables

5

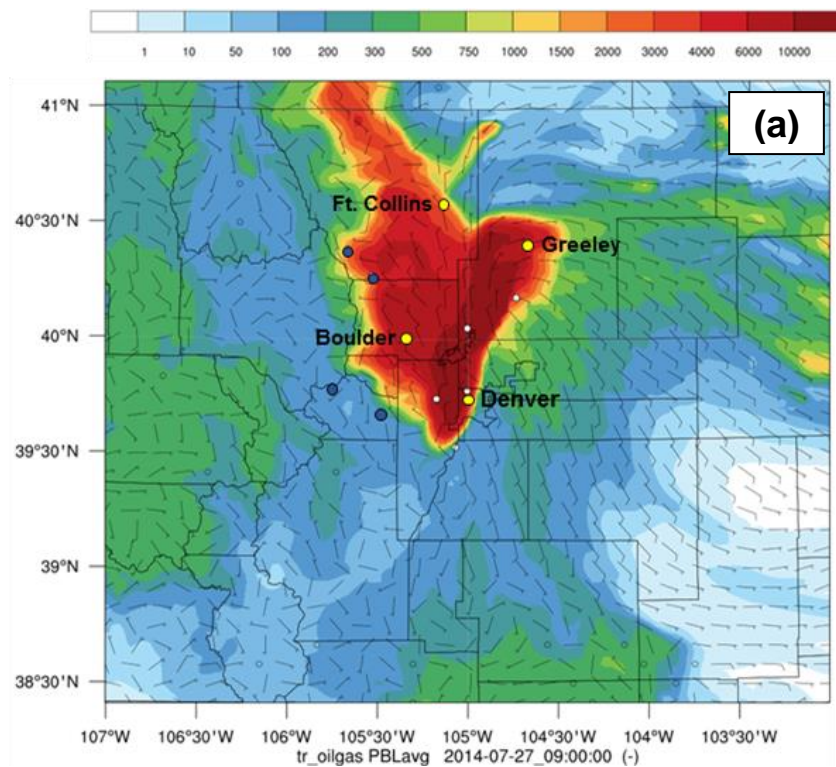

10

15

20

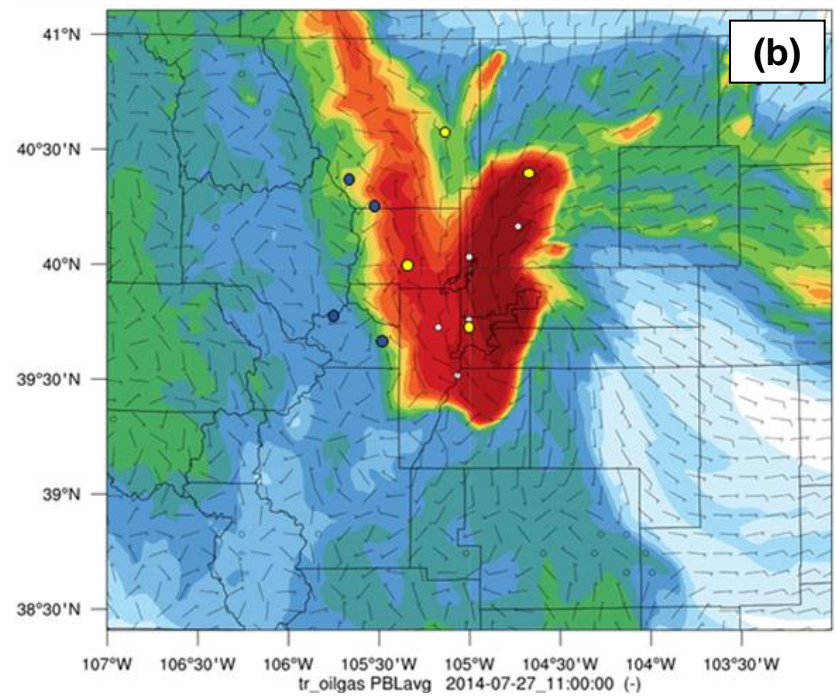

25

30

5

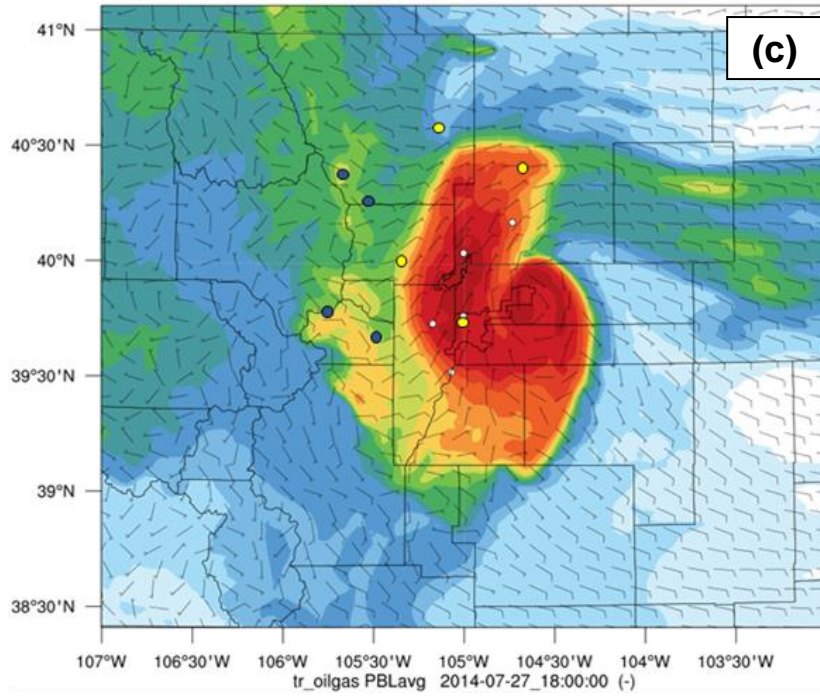

10

15

20

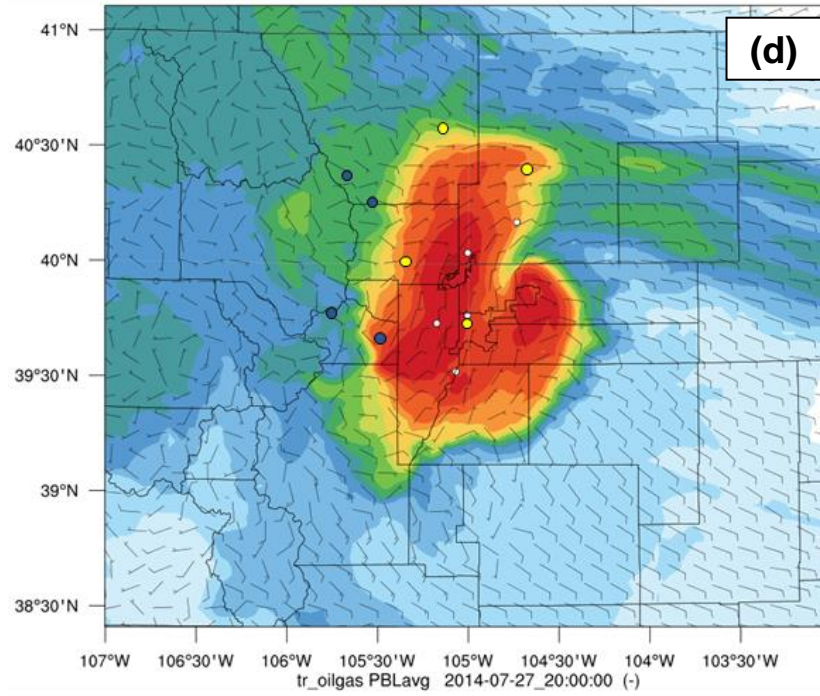

25

30

5

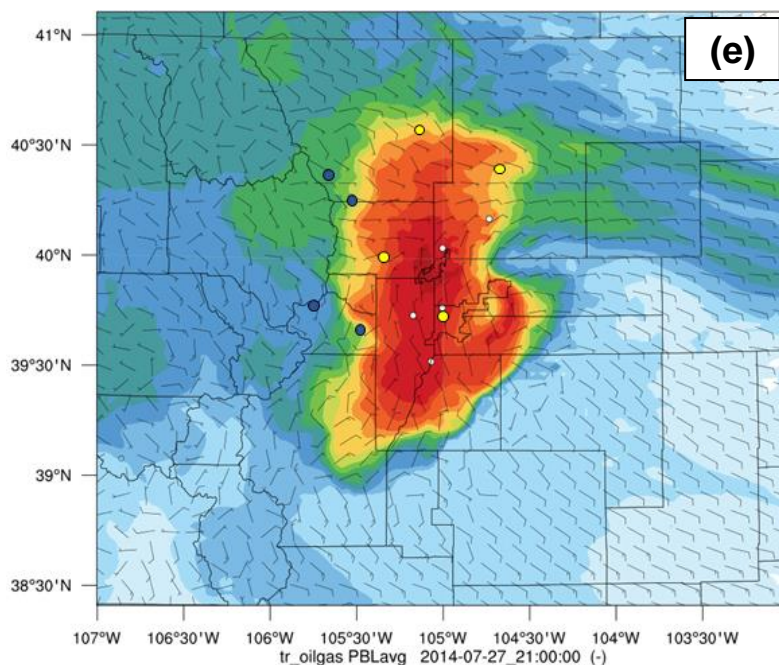

10

15

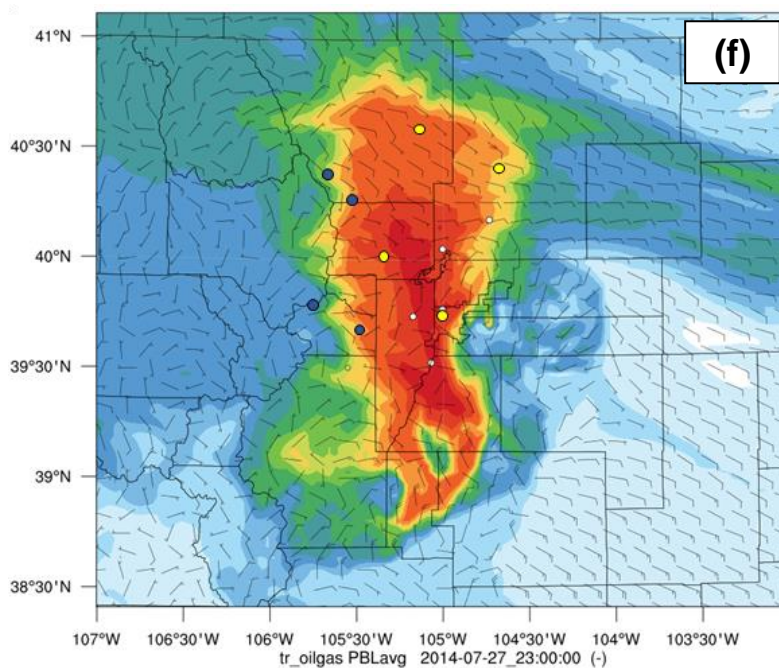

20

25 **Figure S1.** WRF-Chem Tracer 24-hr model results for Sunday, July 27, 2014 during the early to late developments of the Denver Cyclone. Oil and gas tracer mixing patterns within the modeled PBLH were forecasted during the advancement of the Denver Cyclone from (9 UTC - 23 UTC). Individual time-frames correspond to: (a) 9:00 UTC (2:00 MST), (b) 11:00 UTC (4:00 MST), (c) 18:00 UTC (11:00 MST), (d) 20:00 UTC (13:00 MST), (e) 21:00 UTC (14:00 MST), (f) 23:00 UTC (16:00 MST). Cities are represented by yellow markers, P-3 spirals during DISCOVER-AQ (white), and mountains sites 30 (blue, from N to S; Longs Peak, Trail Ridge Road, Mines Peak, Squaw Mountain).

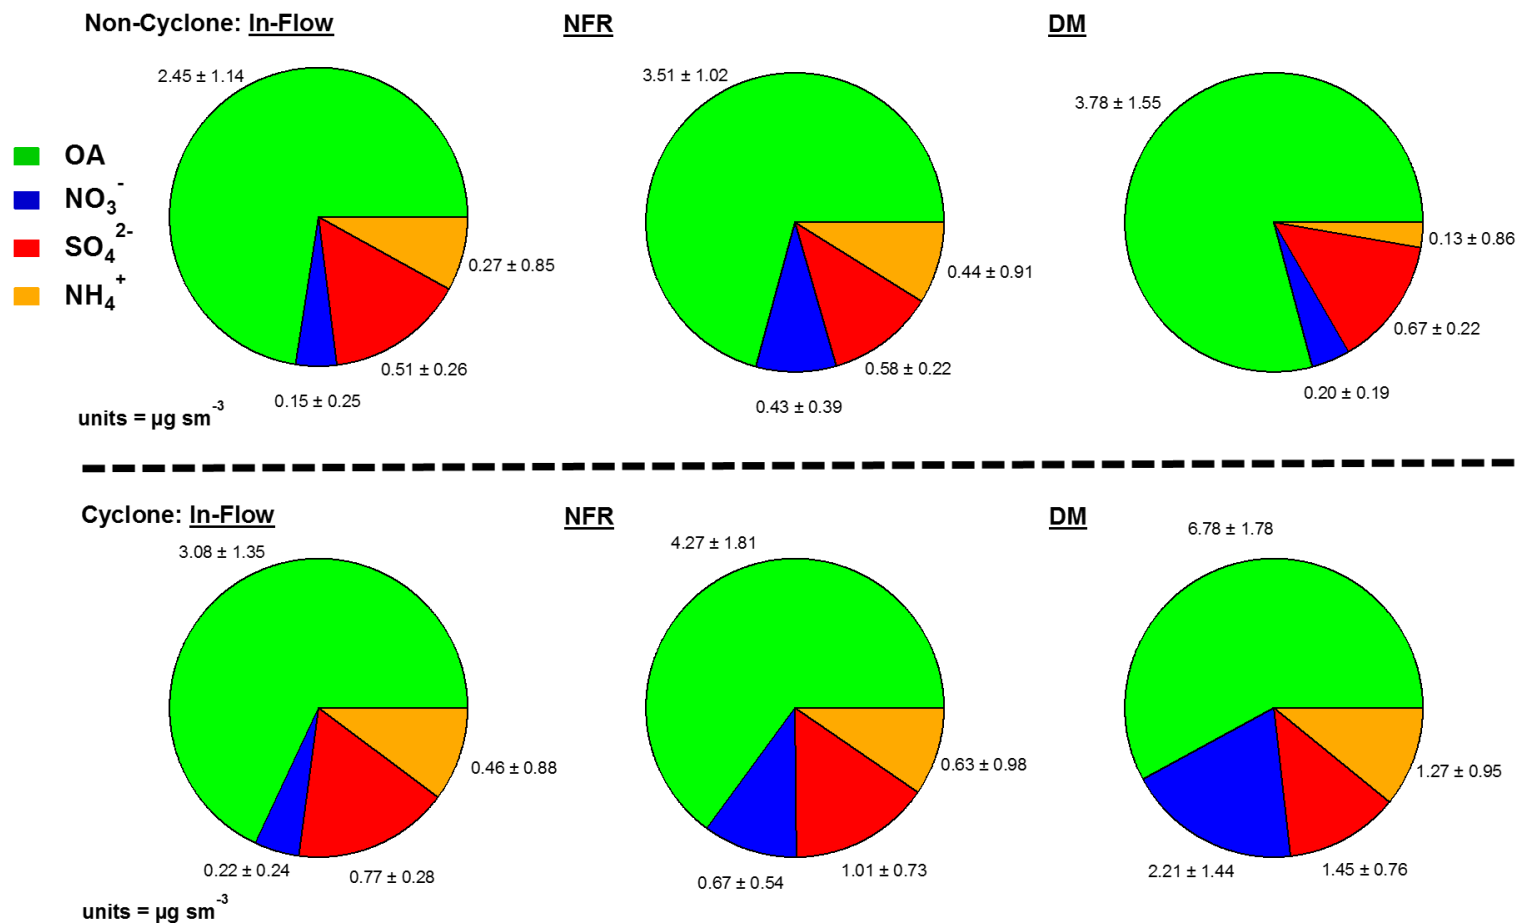

5 **Figure S2.** Average chemical composition of NR-PM<sub>1</sub> for different regions during the non-cyclone (**top**) and cyclone episodes (**bottom**) within the three study regions of the Front Range. Chloride (Cl<sup>-</sup>), not shown, was below the instrument detection limit.

| Scenario                                       | Input                                                                                  |                                                    |                                                                                       |             |            | Output                                |                                      | Calc.                                            |
|------------------------------------------------|----------------------------------------------------------------------------------------|----------------------------------------------------|---------------------------------------------------------------------------------------|-------------|------------|---------------------------------------|--------------------------------------|--------------------------------------------------|
|                                                | NO <sub>3</sub> <sup>-</sup> +HNO <sub>3</sub><br>Aer. <sup>a</sup> + (g) <sup>b</sup> | SO <sub>4</sub> <sup>2-</sup><br>Aer. <sup>a</sup> | NH <sub>4</sub> <sup>+</sup> +NH <sub>3</sub><br>Aer. <sup>a</sup> + (g) <sup>b</sup> | RH<br>(%)   | T<br>(K)   | HNO <sub>3</sub><br>Aer. <sup>a</sup> | HNO <sub>3</sub><br>(g) <sup>b</sup> | f <sub>NO<sub>3</sub></sub><br>Aer. <sup>a</sup> |
| <i>Non-Cyclone - NFR</i>                       | 2.1                                                                                    | 0.6                                                | 12.2                                                                                  | 38.3        | 296        | 0.10                                  | 2.00                                 | 0.05                                             |
| <i>Non-Cyclone - DM</i>                        | 2.8                                                                                    | 0.7                                                | 2.8                                                                                   | 34.0        | 297        | 0.02                                  | 2.74                                 | 0.01                                             |
| <i>Cyclone - NFR</i>                           | 2.0                                                                                    | 1.1                                                | 10.1                                                                                  | 55.6        | 295        | 0.33                                  | 1.67                                 | 0.16                                             |
| <i>Cyclone - DM</i>                            | 4.2                                                                                    | 1.5                                                | 7.4                                                                                   | 64.2        | 294        | 1.51                                  | 2.68                                 | 0.36                                             |
| <i>Non-Cyclone - NFR w/ cyclone RH &amp; T</i> | 2.1                                                                                    | 0.6                                                | 12.2                                                                                  | <b>55.6</b> | <b>295</b> | 0.29                                  | 1.81                                 | 0.14                                             |
| <i>Non-Cyclone - DM w/ cyclone RH &amp; T</i>  | 2.8                                                                                    | 0.7                                                | 2.8                                                                                   | <b>64.2</b> | <b>294</b> | 0.15                                  | 2.61                                 | 0.05                                             |

<sup>a</sup> aerosol-phase = Aer., μg sm<sup>-3</sup> air

<sup>b</sup> gas-phase = (g), μg sm<sup>-3</sup> air

**Table S1.** Summary table of the ISORROPIA II input parameters and output values in a forward based calculation, with all aerosol species assumed to be in a metastable state. Inorganic nitrate partitioning calculations is reported as a fraction of nitrate present in the aerosol phase (*f*<sub>NO<sub>3</sub></sub>). Highlighted in *blue* are RH and T parameters from the cyclone period used, with the non-cyclone aerosol mass concentration inputs to determine the thermodynamic influence on *f*<sub>NO<sub>3</sub></sub>.

10

15

| Scenario<br>Cyclone – DM Only                                 | Input                                                                                  |                                                    |                                                                                       |             |          | Output                                |                                      | Calc.                                 |
|---------------------------------------------------------------|----------------------------------------------------------------------------------------|----------------------------------------------------|---------------------------------------------------------------------------------------|-------------|----------|---------------------------------------|--------------------------------------|---------------------------------------|
|                                                               | NO <sub>3</sub> <sup>-</sup> +HNO <sub>3</sub><br>Aer. <sup>a</sup> + (g) <sup>b</sup> | SO <sub>4</sub> <sup>-2</sup><br>Aer. <sup>a</sup> | NH <sub>4</sub> <sup>+</sup> +NH <sub>3</sub><br>Aer. <sup>a</sup> + (g) <sup>b</sup> | RH<br>(%)   | T<br>(K) | HNO <sub>3</sub><br>Aer. <sup>a</sup> | HNO <sub>3</sub><br>(g) <sup>b</sup> | f <sub>NO3</sub><br>Aer. <sup>a</sup> |
| <i>(Baseline) DM w/obs. total SO<sub>4</sub><sup>-2</sup></i> | 4.2                                                                                    | <b>1.5</b>                                         | <b>7.4</b>                                                                            | 64.2        | 294      | 1.52                                  | 2.67                                 | 0.36                                  |
| <i>DM w/o total SO<sub>4</sub><sup>-2</sup></i>               | 4.2                                                                                    | <b>0.0</b>                                         | <b>6.8</b>                                                                            | 64.2        | 294      | 4.19                                  | 3.0E-4                               | 0.99                                  |
| <i>DM w/obs. total SO<sub>4</sub><sup>-2</sup> @ RH 85%</i>   | 4.2                                                                                    | <b>1.5</b>                                         | <b>7.4</b>                                                                            | <b>85.0</b> | 294      | 3.09                                  | 1.10                                 | 0.74                                  |
| <i>DM w/obs. total SO<sub>4</sub><sup>-2</sup> @ RH 35%</i>   | 4.2                                                                                    | <b>1.5</b>                                         | <b>7.4</b>                                                                            | <b>35.0</b> | 294      | 0.41                                  | 3.78                                 | 0.10                                  |

Total NH<sub>x</sub>= NH<sub>4</sub><sup>+</sup> (aer.) +NH<sub>3</sub> (g) was calculated to fully neutralized total SO<sub>4</sub><sup>-2</sup>

<sup>a</sup> aerosol-phase = Aer., μg sm<sup>-3</sup> air

<sup>b</sup> gas-phase = (g), μg sm<sup>-3</sup> air

**Table S2.** Sulfate summary table of aerosol sulfate and RH variation with ISORROPIA II input parameters and output values in a forward based calculation, with all aerosol species assumed to be in a metastable state. Inorganic nitrate partitioning calculations is reported as a fraction of nitrate present in the aerosol phase (f<sub>NO<sub>3</sub></sub>). Highlighted in *red* are variations of sulfate concentration input, *orange* is the calculated ammonium associated to fully neutralize sulfate present, and *blue* is the RH variation inputs.
